# Supplementary material for: Self-templated fabrication of FeMnO3 nanoparticle-filled polypyrrole nanotubes for peroxidase mimicking with a synergistic effect and their sensitive colorimetric detection of glutathione
Source: Royal Society of Chemistry journal article supplement (doi:10.1039/c8cc01574k), 2018-01-01
Supplement: c8cc01574k1.pdf [file c8cc01574k1.pdf]

**Electronic Supplementary Information**

**Self-templated fabrication of FeMnO<sub>3</sub> nanoparticle-filled polypyrrole nanotubes  
for peroxidase mimicking with a synergistic effect and their sensitive  
colorimetric detection of glutathione**

Maoqiang Chi, Sihui Chen, Mengxiao Zhong, Ce Wang, Xiaofeng Lu\*

Alan G. MacDiarmid Institute, College of Chemistry, Jilin University, Changchun,  
130012, P. R. China.

\*Corresponding author

Email: xflu@jlu.edu.cn

Tel: +86 431 85168292

Fax: +86 431 85168292

## **Experimental section**

### **Materials**

Polyvinyl pyrrolidone (PVP,  $M_w=1300000$  g mol<sup>-1</sup>) was purchased from Sigma-Aldrich. Manganese(II) acetate tetrahydrate ( $Mn(Ac)_2 \cdot 4H_2O$ ) and iron(III) nitrate nonahydrate ( $Fe(NO_3)_3 \cdot 9H_2O$ ) were obtained from Huadong Chemical Industry (Tianjin) Co., Ltd and Tianjin Guangfu Fine Chemical Research Institute, respectively. 3,3',5,5'-tetramethylbenzidine (TMB) was purchased from Sinopharm chemical reagent Beijing Co., Ltd. Pyrrole and dimethyl sulfoxide (DMSO) were provided by Aladdin. N,N-dimethylformamide (DMF) was bought from Tiantai Fine Chemical Co., Ltd. Hydrochloric acid (HCl),  $H_2O_2$  and ethanol were obtained from Beijing Chemical Works. All the chemicals mentioned in this work were used as received without any further purification.

### **Fabrication of $FeMnO_3$ nanofibers via an electrospinning and calcination process**

$FeMnO_3$  nanofibers were prepared by a typical electrospinning technique and calcination process. Firstly, 0.245 g of  $Mn(Ac)_2 \cdot 4H_2O$  and 0.404 g of  $Fe(NO_3)_3 \cdot 9H_2O$  were dissolved in a mixed solvent consisting of 3 mL of ethanol and 3 mL of DMF under vigorous stirring for 1 h, then 0.47 g of PVP was slowly added. After constant stirring for 12 h, a homogeneous viscous solution was obtained. Secondly, the as prepared solution was electrospun using a glass syringe with a tip inner at an applied voltage of 15 kV over a distance of 20 cm between the syringe tip and the aluminum foil collector. Finally, the PVP/ $Fe(NO_3)_3$ / $Mn(Ac)_2$  fibrous membranes were prepared on the aluminum foil. To prepare  $FeMnO_3$  nanofibers, the electrospun PVP/ $Fe(NO_3)_3$ / $Mn(Ac)_2$  fibrous membrane was peeled off from the collector and was calcined at 550 °C in air for 3 h referring to a defined heating program. Then, a rufous colored powder of the  $FeMnO_3$  nanofibers was obtained.

### **Fabrication of $FeMnO_3$ nanoparticle-filled polypyrrole nanotubes**

A total of 5 mg  $FeMnO_3$  nanofibers were put into a small beaker and then transferred into a vacuum desiccator equipped with 0.3 mL of pyrrole and 2.4 mL of

HCl (5 M) in two separated small bottles. After evacuation for about 5 min, the vacuum desiccator was left at room temperature for 0.5 h, 1 h, 2 h, and 3 h, respectively, to fabricate FeMnO<sub>3</sub> nanoparticle-filled PPy nanotubes (FeMnO<sub>3</sub>@PPy nanotubes) with different PPy shell thickness.

### **Peroxidase-like catalytic activities of FeMnO<sub>3</sub>@PPy nanotubes**

To evaluate the peroxidase-like activity of FeMnO<sub>3</sub>@PPy nanotubes, a colorimetric experiment toward the oxidation of TMB substrate in the presence of H<sub>2</sub>O<sub>2</sub> was applied. In a typical procedure, 20  $\mu$ L of TMB solution (15 mM in DMSO) and 20  $\mu$ L of H<sub>2</sub>O<sub>2</sub> (30 wt%) were added into 3 mL of acetate buffer solution (pH = 4.0, unless otherwise stated). After that, 20  $\mu$ L of FeMnO<sub>3</sub> nanofibers and FeMnO<sub>3</sub>@PPy nanotubes aqueous suspension (3.0 mg mL<sup>-1</sup>) was injected into the solution mentioned above. Catalytic activity measurements were conducted by monitoring the absorbance changes at 651 nm in time course mode. The steady-state kinetics analysis was carried out by keeping the concentration of H<sub>2</sub>O<sub>2</sub> constant and varying the concentrations of TMB when using TMB as substrate. On the contrary, the concentration of TMB was fixed and the concentration of H<sub>2</sub>O<sub>2</sub> was changed for H<sub>2</sub>O<sub>2</sub> as substrate.

### **Colorimetric detection of H<sub>2</sub>O<sub>2</sub> and glutathione (GSH)**

For the colorimetric detection of H<sub>2</sub>O<sub>2</sub>, varied concentrations of H<sub>2</sub>O<sub>2</sub>, together with 20  $\mu$ L of TMB (15 mM) and 20  $\mu$ L of catalyst (3 mg mL<sup>-1</sup>) was added into 3 mL of acetate buffer solution (pH = 4.0). Then time-course detection with UV-vis spectrometer at 651 nm for 600 s was applied to achieve a dose of H<sub>2</sub>O<sub>2</sub> concentration-dependent responsive curves. The colorimetric detection of GSH is similar with the detection of H<sub>2</sub>O<sub>2</sub>. In a typical procedure, varied concentrations of GSH was added into 3.0 mL of acetate buffer solution (pH = 4) containing 20  $\mu$ L of catalyst suspension (3 mg mL<sup>-1</sup>), 20  $\mu$ L of TMB solution (15 mM DMSO) and 20  $\mu$ L of H<sub>2</sub>O<sub>2</sub> (30 wt%). Then UV-vis absorbance spectroscopy at 651 nm was used to monitor the absorbance changes. To elevate the selectivity of the proposed detection method, 80  $\mu$ M of phenylalanine (Phe), histidine (His), tryptophan (Trp), methionine (Met), tyrosine (Tyr), valine (Val), uric acid (UA), lysine (Lys), L-cysteine (Cys),

homocysteine (Hcy), glucose (Glu), NaCl, KCl, CaCl<sub>2</sub> were added into the above reaction system instead of GSH.

### **Analysis of GSH in human serum samples**

Human serum samples were donated by Changchun Sino-Japanese Friendship Hospital (Changchun, China). For the colorimetric detection of GSH in human serum samples, 20  $\mu$ L of TMB solution (15 mM in DMSO) and 20  $\mu$ L of H<sub>2</sub>O<sub>2</sub> (30 wt%) were added into 3 mL of acetate buffer solution (pH = 4.0) containing 20  $\mu$ L of human serum samples. After that, 20  $\mu$ L of catalyst aqueous suspension (3.0 mg mL<sup>-1</sup>) was injected into the solution mentioned above. Then UV-vis absorbance spectroscopy at 651 nm was used to monitor the absorbance changes for 600 s, the maximum absorbance was collected for analysis. After that, different concentrations (4  $\mu$ M, 6  $\mu$ M and 8  $\mu$ M) of GSH were added for spiking. The concentration of GSH in the serum samples was quantified by the linear equation.

### **Characterization**

The morphologies of the as-prepared samples were characterized by field emission scanning electron microscopy (SEM, FEI Nova NanoSEM 450) and transmission electron microscopy (TEM, JEOLJEM-1200 EX) operated at 15 and 100 kV, respectively. High-resolution transmission electron microscopy (HRTEM) images with selected area electron diffraction (SAED) patterns and energy dispersive X-ray (EDX) analysis were obtained using a FEI Tecnai G2 F20 high resolution transmission electron microscope operated at a 200 kV accelerating voltage. X-ray diffraction (XRD) patterns were obtained with an x-ray diffractometer (Empyrean, PANalytical B.V.) based on Cu-K $\alpha$  radiation in the range of 10-90°. Analysis of the X-ray photoelectron spectra (XPS) was performed on a Thermo ESCALAB 250 spectrometer. Fourier transform infrared (FTIR) spectroscopy was used to record FTIR spectra by BRUKER VECTOR 22 Spectrometer using KBr powder-pressed pellets. UV-vis absorption spectroscopy was performed on a Shimadzu UV-2501 PC spectrometer.

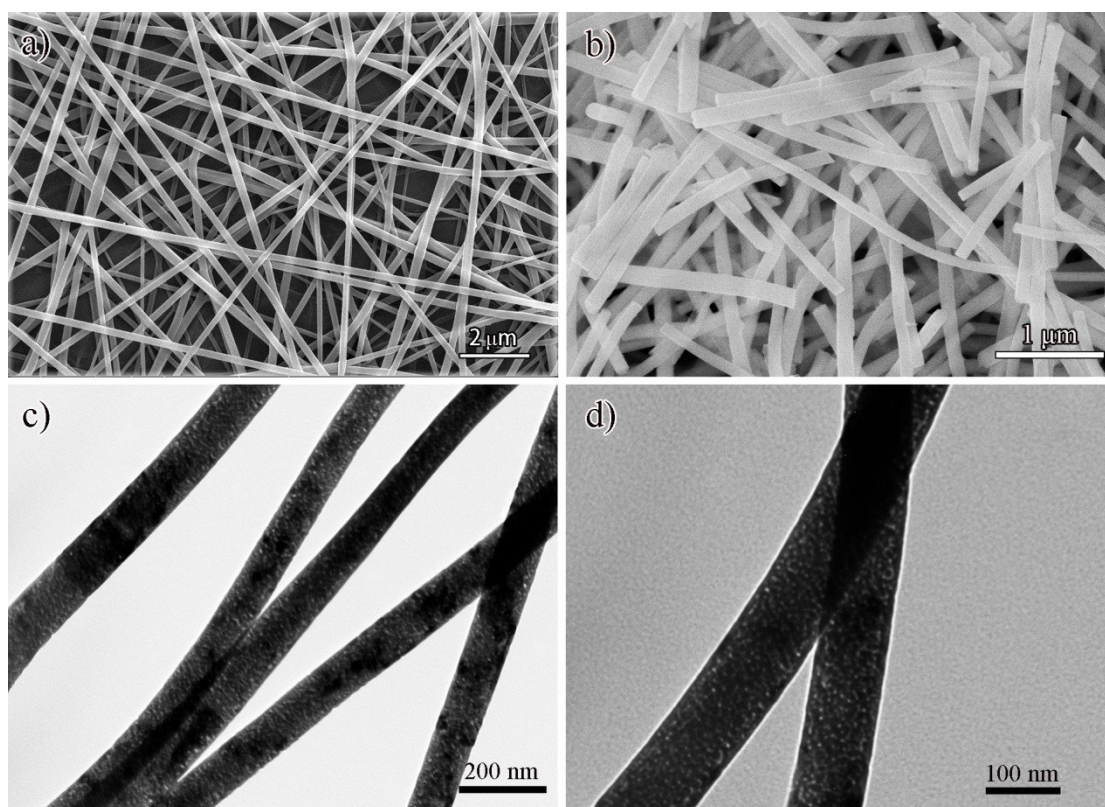

Figure S1. a) SEM image of the electrospun PVP/Fe(NO<sub>3</sub>)<sub>3</sub>/Mn(Ac)<sub>2</sub> nanofibers; b) SEM image of the calcined FeMnO<sub>3</sub> nanofibers; c, d) TEM images of the prepared FeMnO<sub>3</sub> nanofibers with a low and high magnifications.

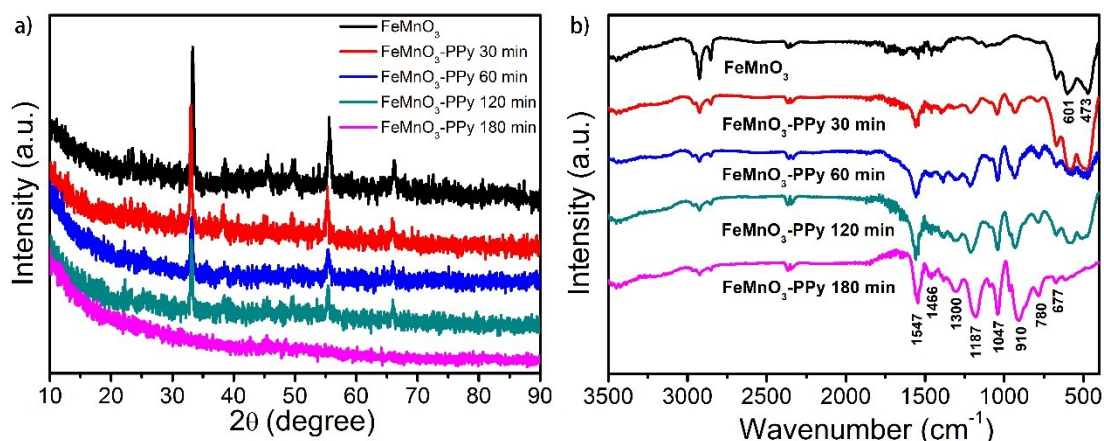

Figure S2. a) XRD patterns and b) FTIR spectra of FeMnO<sub>3</sub> nanofibers and FeMnO<sub>3</sub>@PPy nanotubes with different polymerization time of 30, 60, 120 and 180 min, respectively.

As shown in Figure S2a, the XRD diffraction peaks centered at around  $2\theta = 23.3^\circ, 33.1^\circ, 38.6^\circ, 45.3^\circ, 49.6^\circ, 55.5^\circ$  and  $66.1^\circ$  are attributed to (211), (222), (400), (332), (134), (440) and (622) planes of the crystallographic cubic perovskite structure of FeMnO<sub>3</sub> (JCPDS 76-0076).<sup>1</sup> The Fourier-transform infrared (FTIR) spectrum of the FeMnO<sub>3</sub> nanofibers is supplemented in Figure S2b. It is clearly observed that the absorption peaks at 473 and 601 cm<sup>-1</sup> are assigned to Mn-O and Fe-O vibrations, respectively.<sup>2</sup>

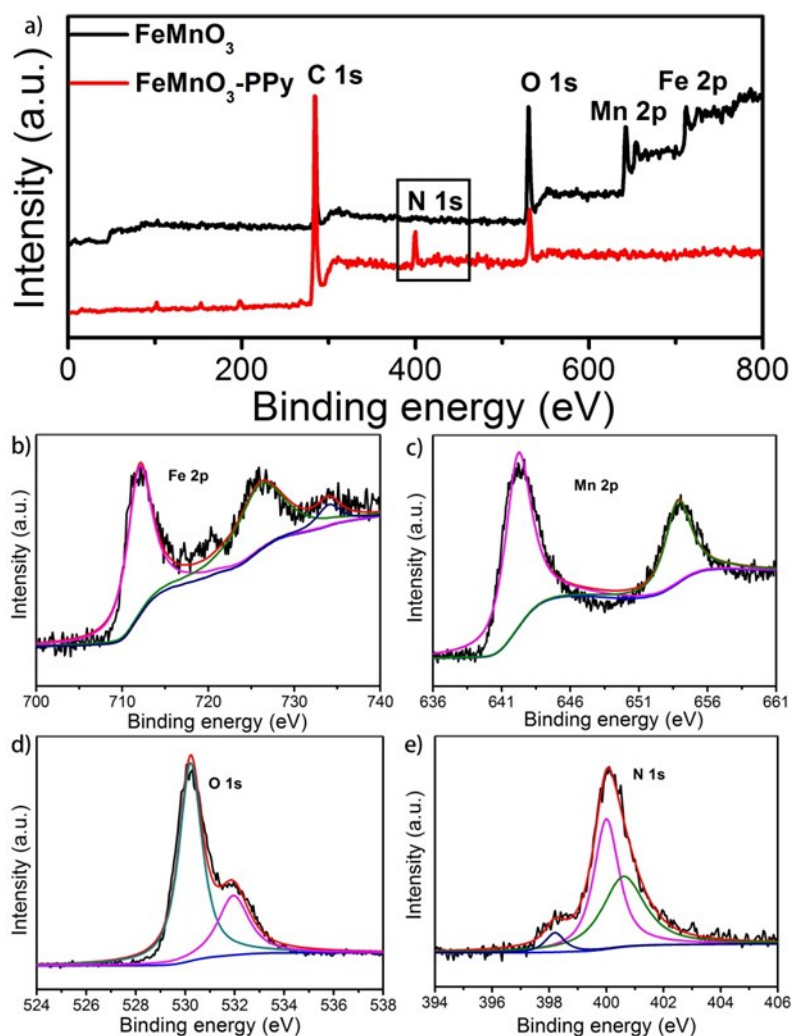

Figure S3. XPS spectra of the as-prepared  $\text{FeMnO}_3$  nanofibers and  $\text{FeMnO}_3@\text{PPy}$  nanotubes: a) full survey spectrum, b) Fe 2p, c) Mn 2p and d) O 1s region in XPS spectrum of  $\text{FeMnO}_3$  nanofibers, e) N 1s region in XPS spectrum of  $\text{FeMnO}_3@\text{PPy}$  nanotubes.

The chemical composition and oxidation state of the  $\text{FeMnO}_3$  nanofibers are further investigated by X-ray photoelectron spectroscopy (XPS). As displayed in Figure S4a, the wide-scan XPS spectrum evidently exhibits the signals of Fe, Mn and O elements in  $\text{FeMnO}_3$  nanofibers. In detail, two peaks located at 712.1 and 726.5 eV with a satellite peak at 734.2 eV can be indexed to  $\text{Fe}^{2+}$  (Figure S4b). Two characteristic peaks of Mn 2p located at 642.2 eV (Mn  $2p_{3/2}$ ) and 653.9 eV (Mn  $2p_{1/2}$ ) are attributed to  $\text{Mn}^{4+}$  with no signal of other valence states of the manganese ions (Figure S4c). In O1s spectrum, the peak at around 530.2 eV is ascribed to the lattice oxygen in Fe/Mn-O framework, while another at around 531.9 eV is related to the hydroxyl group (Figure S4d).<sup>1,3</sup>

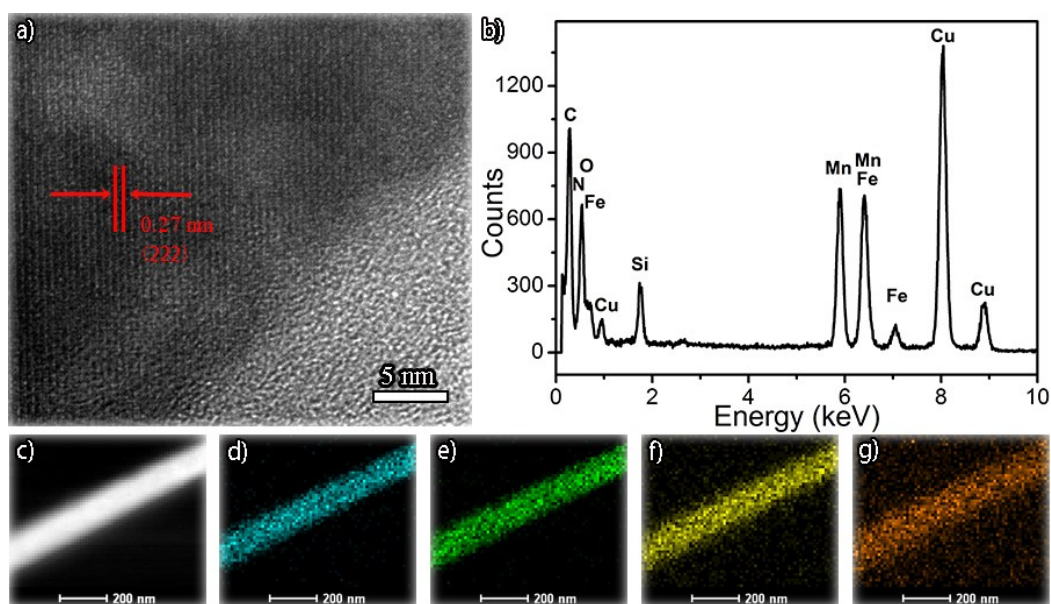

Figure S4. a) HRTEM image and b) EDX spectrum of the prepared FeMnO<sub>3</sub>@PPy nanotubes; c) HAADF-STEM pattern and EDX element mapping images of d) Fe-K, e) Mn-K, f) O-K, g) N-K in FeMnO<sub>3</sub>@PPy nanotubes.



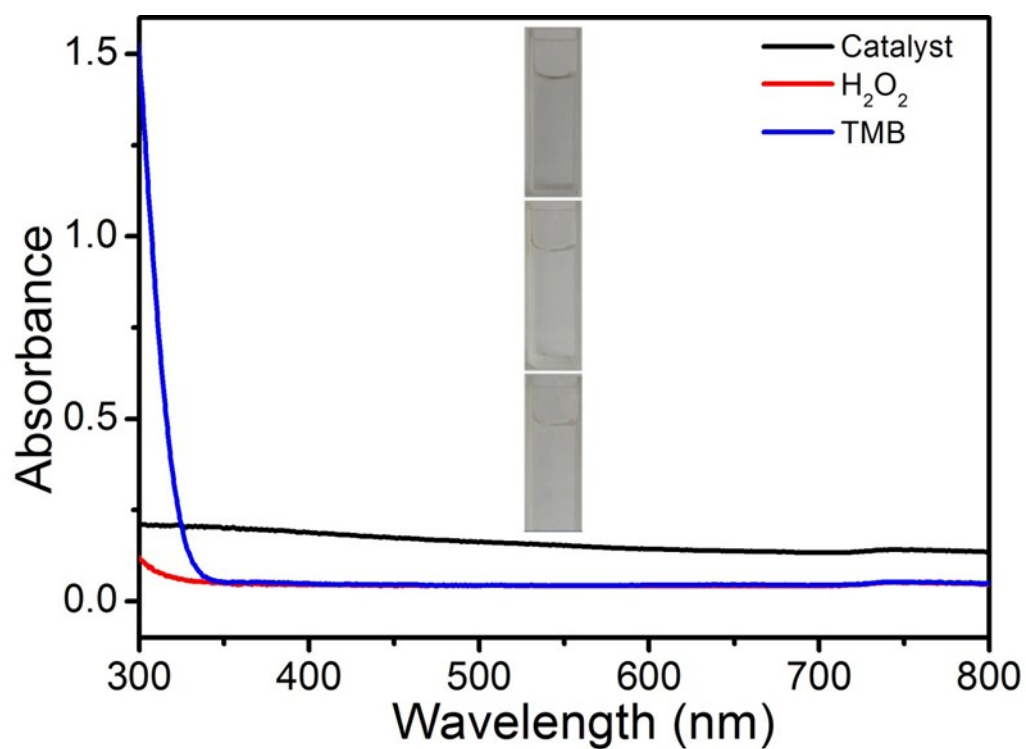

Figure S5. UV-vis absorbance curves of absorption mode against catalyst, TMB and H<sub>2</sub>O<sub>2</sub> at 10 min in acetate buffer solution (pH = 4), the inset displays the pertinent photographs.

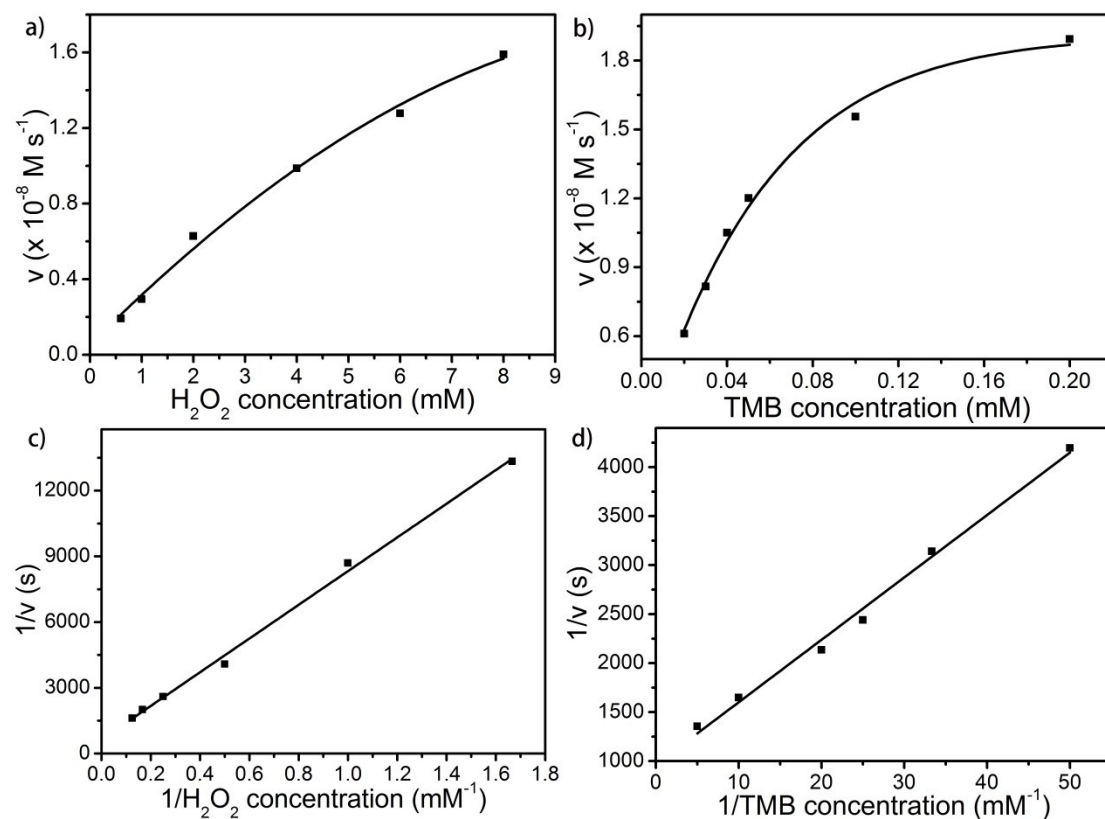

Figure S6. Steady-state kinetic experiments of FeMnO<sub>3</sub>@PPy nanotubes. The catalyst concentration was kept constant at 20 μg mL<sup>-1</sup> in 3 mL of acetate buffer solution (pH = 4). a) The concentration of TMB was fixed at 100 μM and the H<sub>2</sub>O<sub>2</sub> content was varied; b) H<sub>2</sub>O<sub>2</sub> concentration was maintained at 5 mM with various concentrations of TMB; c, d) The corresponding double reciprocal plots of H<sub>2</sub>O<sub>2</sub> and TMB.

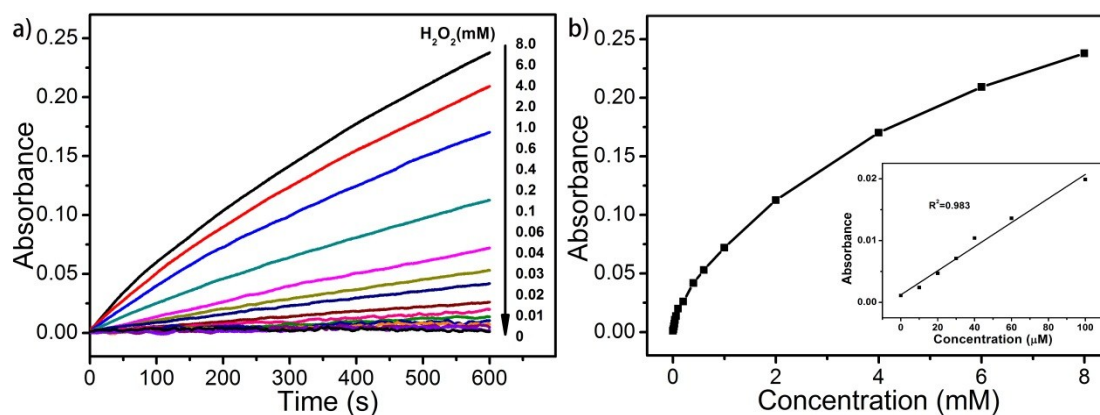

Figure S7. a) The absorbance changes of the catalytic oxidation of TMB by the as-prepared  $FeMnO_3@PPy$  nanotubes in the absence or presence of  $H_2O_2$  with various concentrations under an optimal acetate buffer solution (pH = 4); b) The dose–response curve with regard to the detection of  $H_2O_2$ , and the inset photograph exhibits the corresponding calibration line.

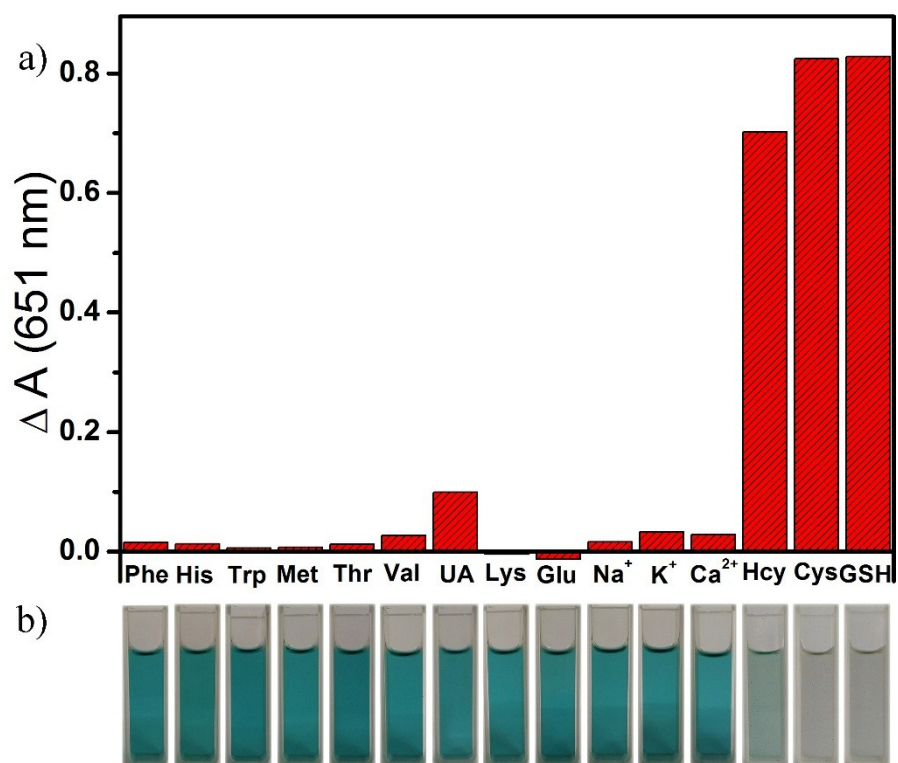

Figure S8. a) The difference values of absorbance at 651 nm between 0 min and 10 min in diverse systems containing fixed concentrations of TMB (0.1 mM), H<sub>2</sub>O<sub>2</sub> (65 mM), catalyst solution (20  $\mu\text{g mL}^{-1}$ ) with GSH (80  $\mu\text{M}$ ) or other different interferential substances (80  $\mu\text{M}$ ); b) The corresponding photographs of the above reaction solutions on 10 min.

Table 1. Comparison of the LOD values among the detection system in this work and the previous reported enzyme-like colorimetric detection approaches.

| Nanomaterials                 | Linear range ( $\mu\text{M}$ ) | LOD ( $\mu\text{M}$ ) | References |
|-------------------------------|--------------------------------|-----------------------|------------|
| $\text{Fe}_3\text{O}_4$ MNPs  | 3-30                           | 3                     | [12a]      |
| CBT-Cys(SET)                  | 0-87                           | 11                    | [12b]      |
| BSA-MnO <sub>2</sub> NPs      | 0.26-26                        | 0.1                   | [12c]      |
| C-dot-Ni(IV)                  | 312-31200                      | 203                   | [12d]      |
| $\text{Ag}^+$                 | 0.05-8                         | 0.05                  | [12e]      |
| $\text{Cu}_{1.8}\text{S}$ NPs | 500-10000                      | 60                    | [12f]      |
| MOFs                          | 0.075-0.475                    | 0.125                 | [12g]      |
| AuNCs                         | 2-25                           | 0.42                  | [12h]      |
| MnO <sub>2</sub> nanosheets   | 0-150                          | 0.38                  | [12i]      |
| ABTS- $\text{Ag}^+$           | 0.1-4                          | 0.059                 | [12j]      |
| $\text{FeMnO}_3@\text{PPy}$   | 0-10                           | 0.036                 | This work  |

Table 2. Determination of GSH concentration in serum samples.

| Serum sample<br>(150-folds<br>diluted) | Without<br>spiking<br>( $\mu\text{M}$ ) $\pm$ SD<br>(n=3) | GSH<br>spiking<br>( $\mu\text{M}$ ) | GSH measured<br>( $\mu\text{M}$ ) $\pm$ SD<br>(n=3) | Recovery(%)<br>) |
|----------------------------------------|-----------------------------------------------------------|-------------------------------------|-----------------------------------------------------|------------------|
| Sample 1                               | 6.108 $\pm$ 0.092                                         | 4                                   | 10.116 $\pm$ 0.454                                  | 100.2            |
| Sample 2                               | 6.450 $\pm$ 0.207                                         | 6                                   | 12.727 $\pm$ 0.533                                  | 104.6            |
| Sample 3                               | 6.148 $\pm$ 0.403                                         | 8                                   | 14.412 $\pm$ 0.260                                  | 103.3            |

## References

1. M. Li, W. Xu, W. Wang, Y. Liu, B. Cui and X. Guo, *J. Power Sources*, 2014, **248**, 465-473.
2. M. H. Habibi and V. Mosavi, *J. Mater. Sci.: Mater. Electron.*, 2017, **28**, 8473-8479.
3. Z. Yang, F. Ma, Y. Zhu, S. Chen, C. Wang and X. Lu, *Dalton Trans*, 2017, **46**, 11171-11179.
